# Supplementary material
Source: ML conference proceedings conference paper supplement (https://aclanthology.org/2022.acl-long.536)

Weighted f1 for Relation Type Prediction on CMV Modes 80-20 split

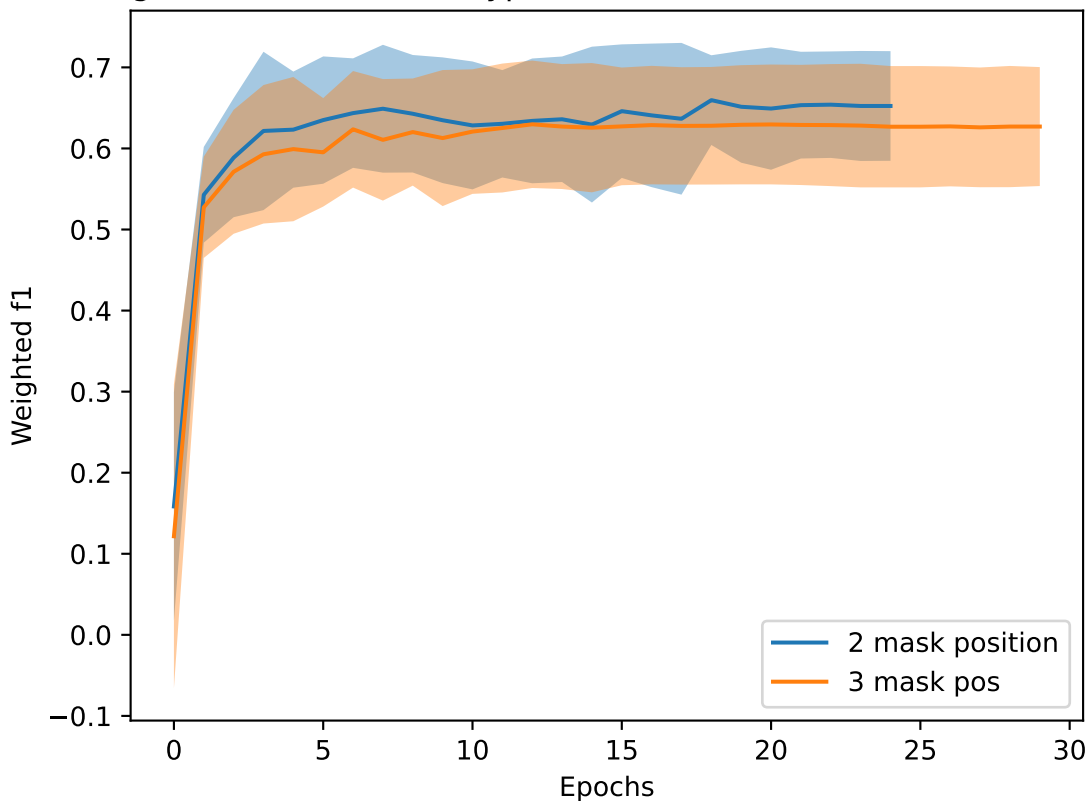

Supplement: software [file 2_vs_3_mask_pos_base_lf.pdf › final_submit_code/logs/plots/2_vs_3_mask_pos_base_lf.pdf]

Weighted f1 for Relation Type Prediction on CMV Modes 50-50 split

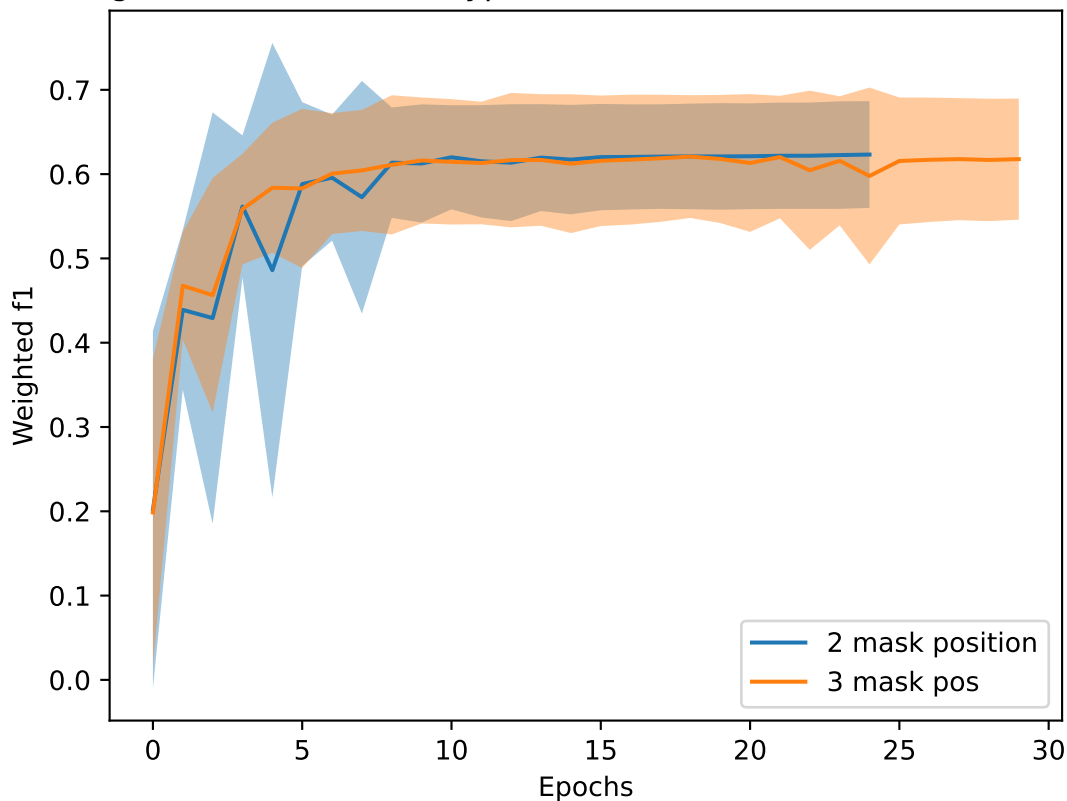

Supplement: software [file 2_vs_3_mask_pos_base_lf1.pdf › final_submit_code/logs/plots/2_vs_3_mask_pos_base_lf1.pdf]

Weighted f1 for Relation Type Prediction on CMV Modes 80-20 split

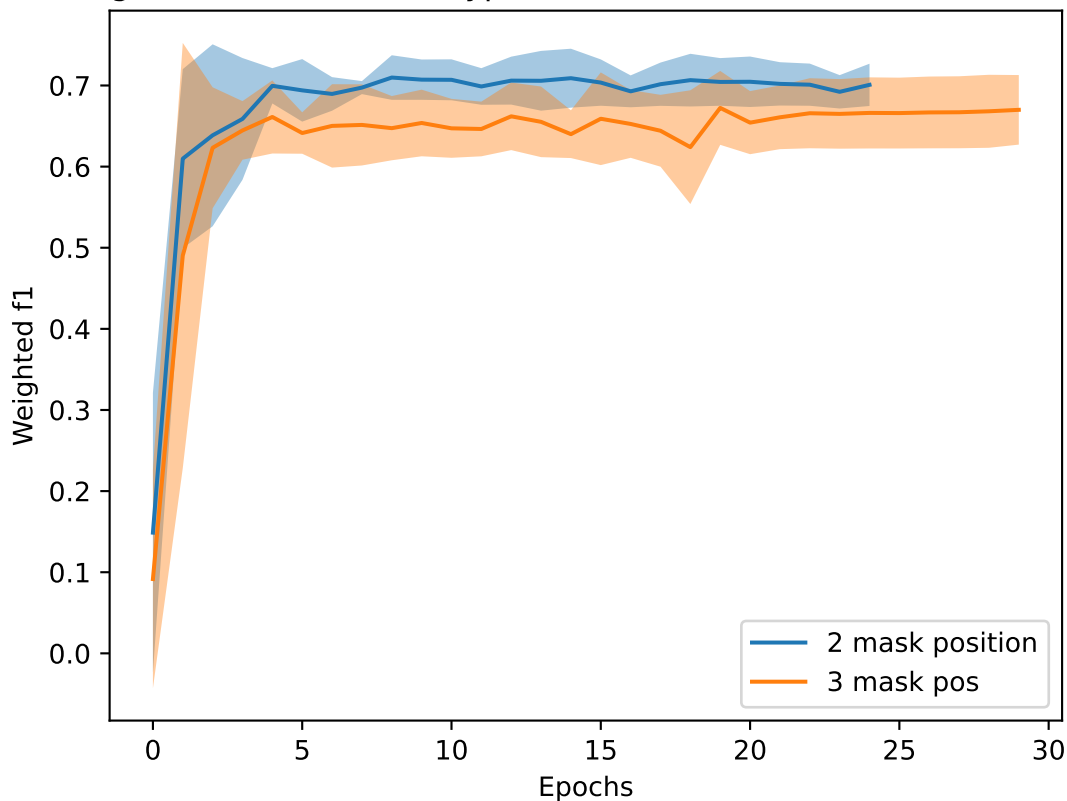

Supplement: software [file 2_vs_3_mask_pos_ckpt4.pdf › final_submit_code/logs/plots/2_vs_3_mask_pos_ckpt4.pdf]

Weighted f1 for Relation Type Prediction on CMV Modes 50-50 split

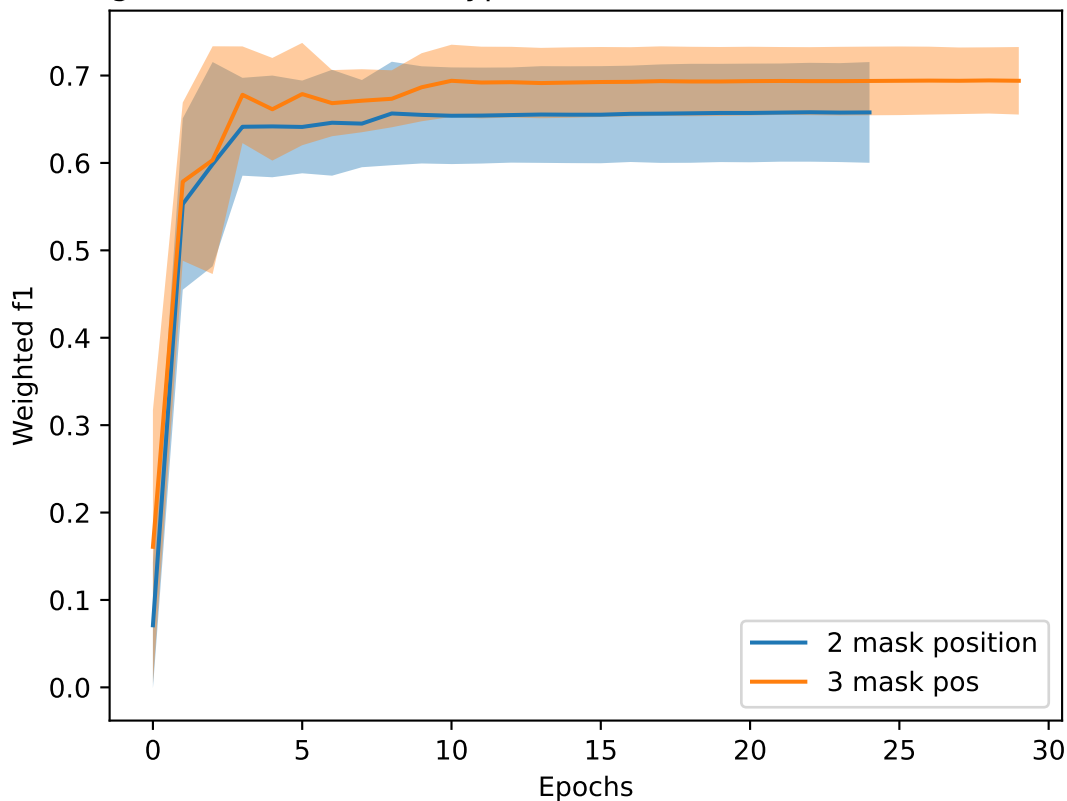

Supplement: software [file 2_vs_3_mask_pos_ckpt4_1.pdf › final_submit_code/logs/plots/2_vs_3_mask_pos_ckpt4_1.pdf]

Micro f1 for ACI on CMV-Modes 80-20 split

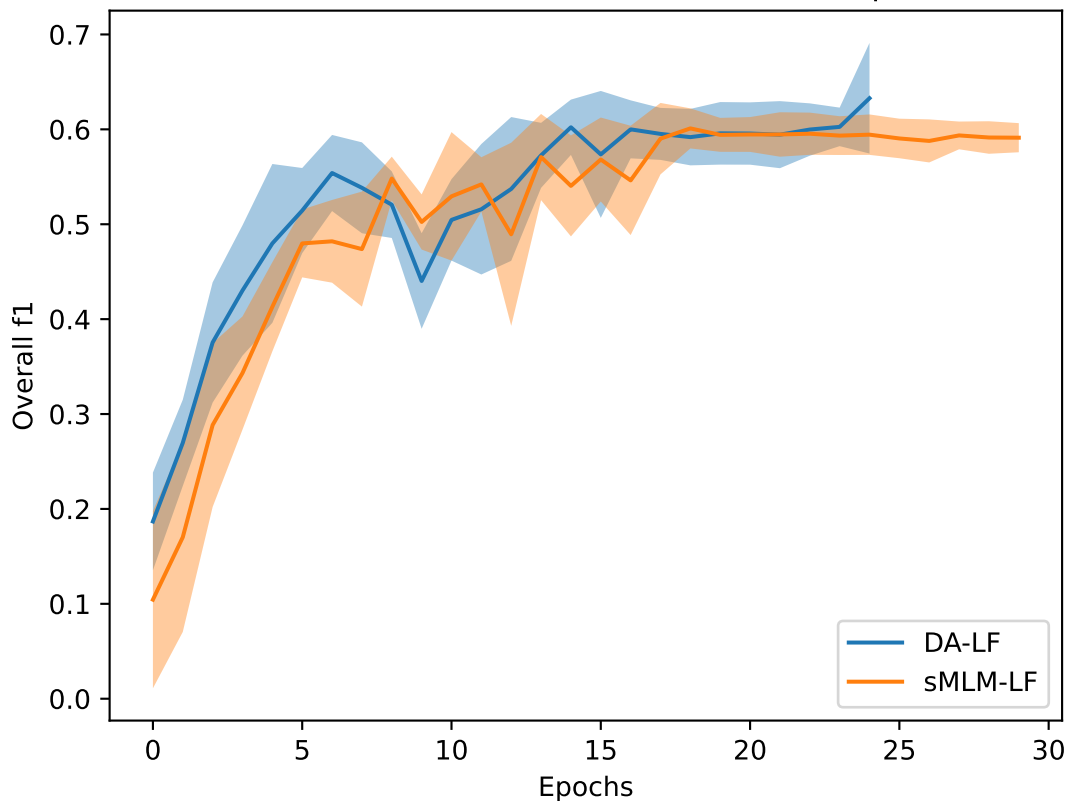

Supplement: software [file DA_vs_sMLM_LF_ACI.pdf › final_submit_code/logs/plots/DA_vs_sMLM_LF_ACI.pdf]

Micro f1 for ACI on CMV-Modes 50-50 split

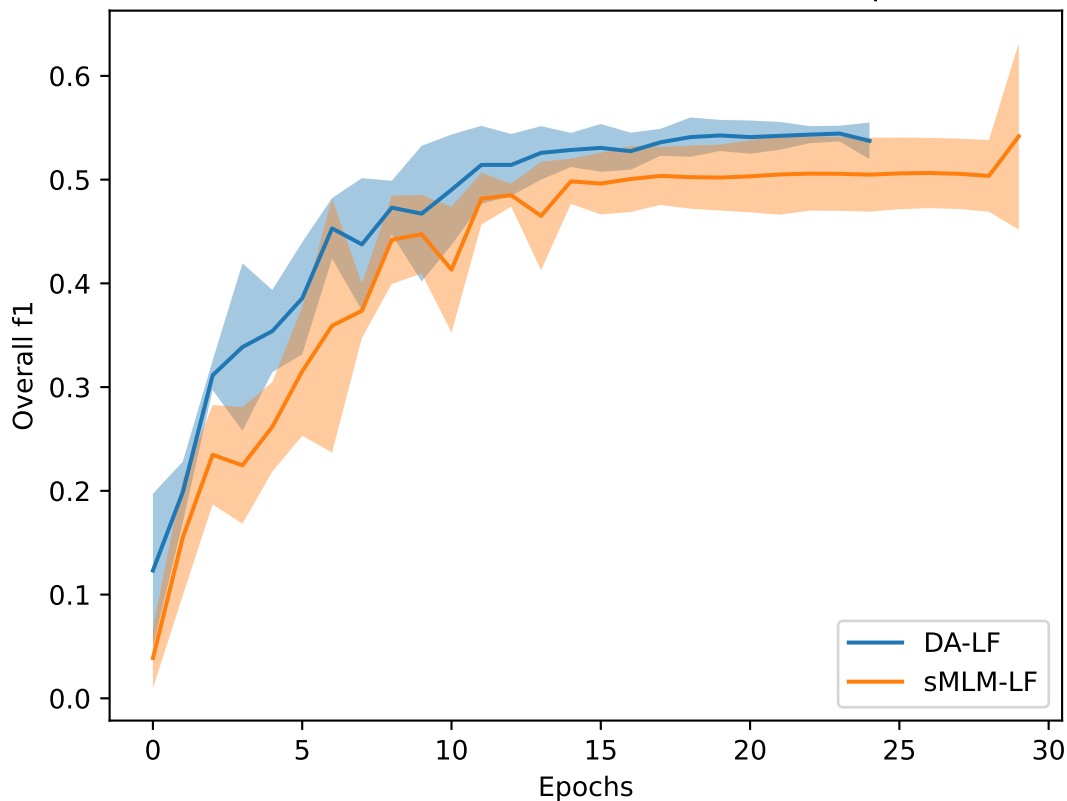

Supplement: software [file DA_vs_sMLM_LF_ACI1.pdf › final_submit_code/logs/plots/DA_vs_sMLM_LF_ACI1.pdf]

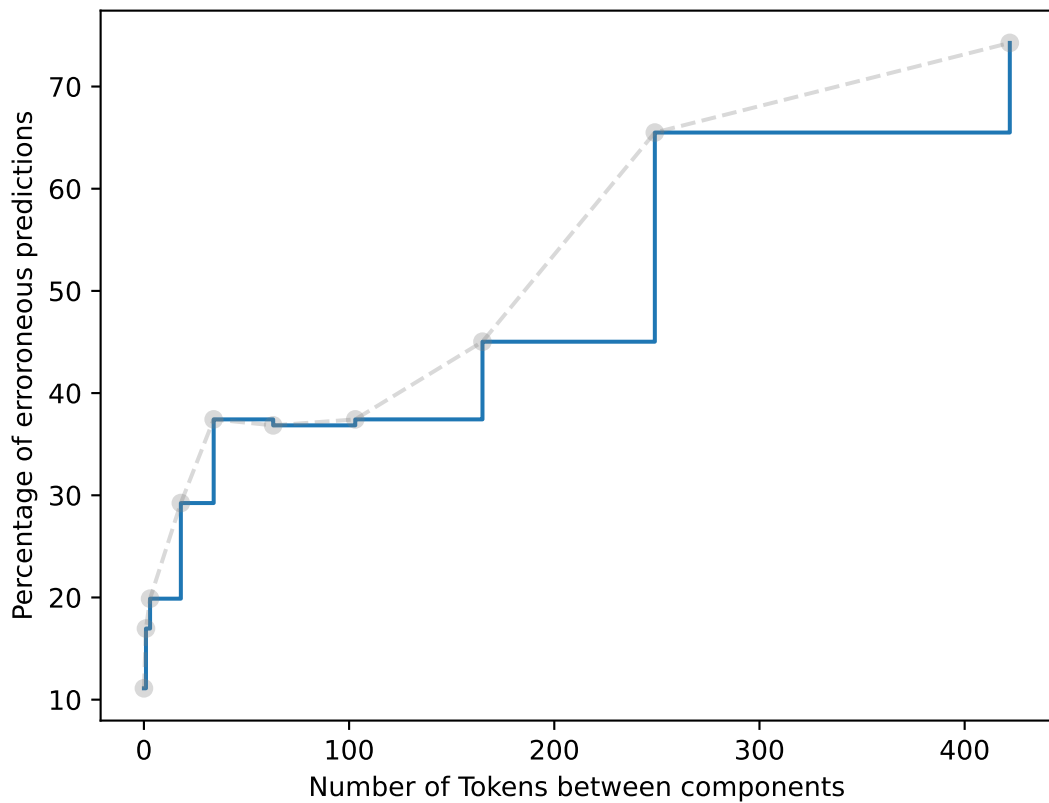

Supplement: software [file base_lf_error_with_dist.pdf › final_submit_code/logs/plots/base_lf_error_with_dist.pdf]

Micro f1 for ACI on CMV Modes 80-20 split

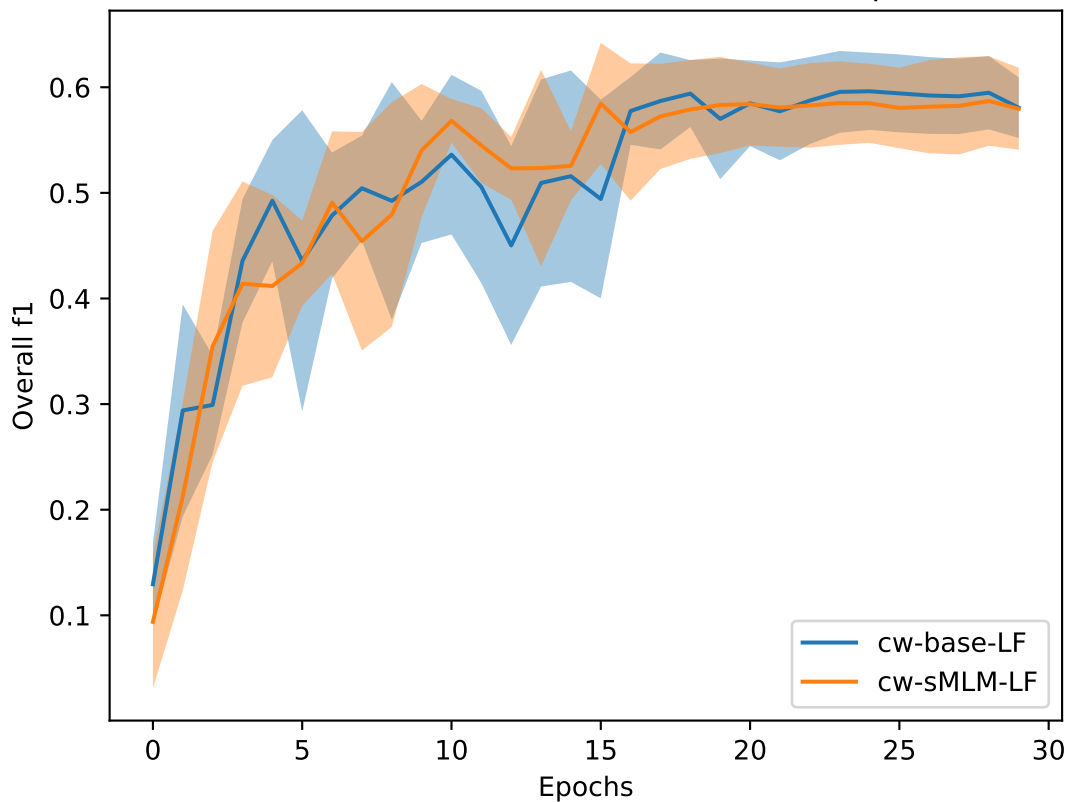

Supplement: software [file base_lf_vs_smlm_lf_cw.pdf › final_submit_code/logs/plots/base_lf_vs_smlm_lf_cw.pdf]

Micro f1 for ACI on CMV Modes 50-50 split

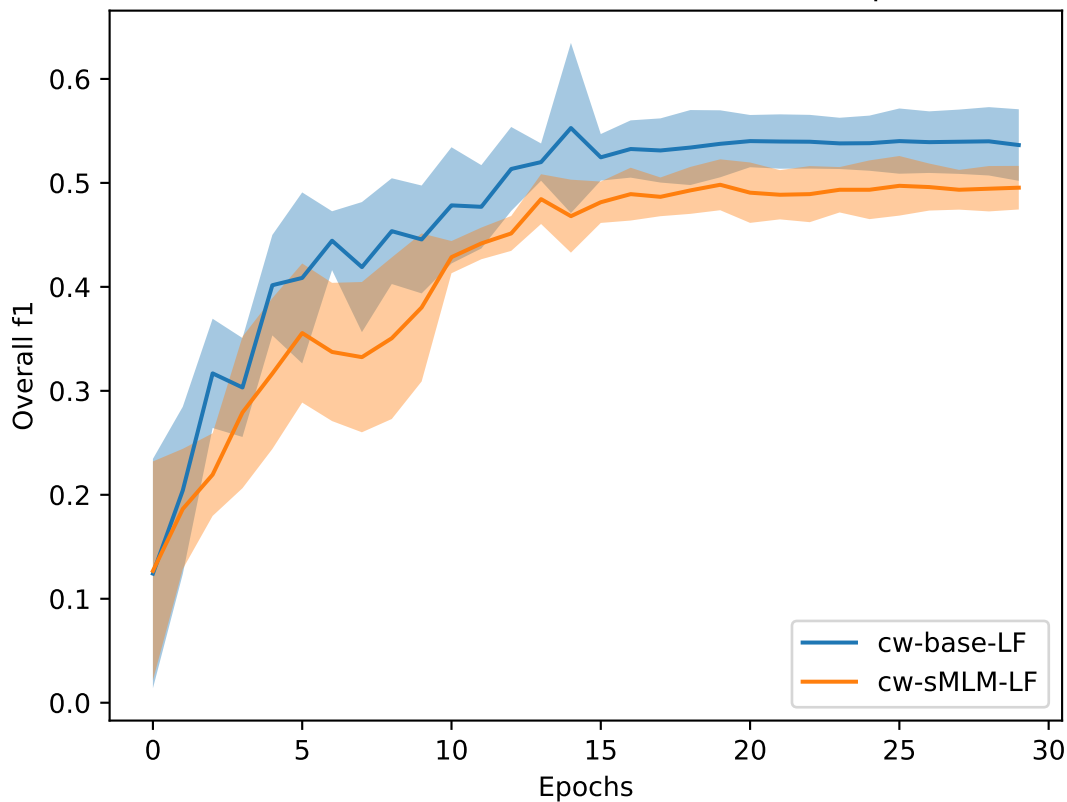

Supplement: software [file base_lf_vs_smlm_lf_cw1.pdf › final_submit_code/logs/plots/base_lf_vs_smlm_lf_cw1.pdf]

Micro f1 for ACI on CMV Modes 80-20 split

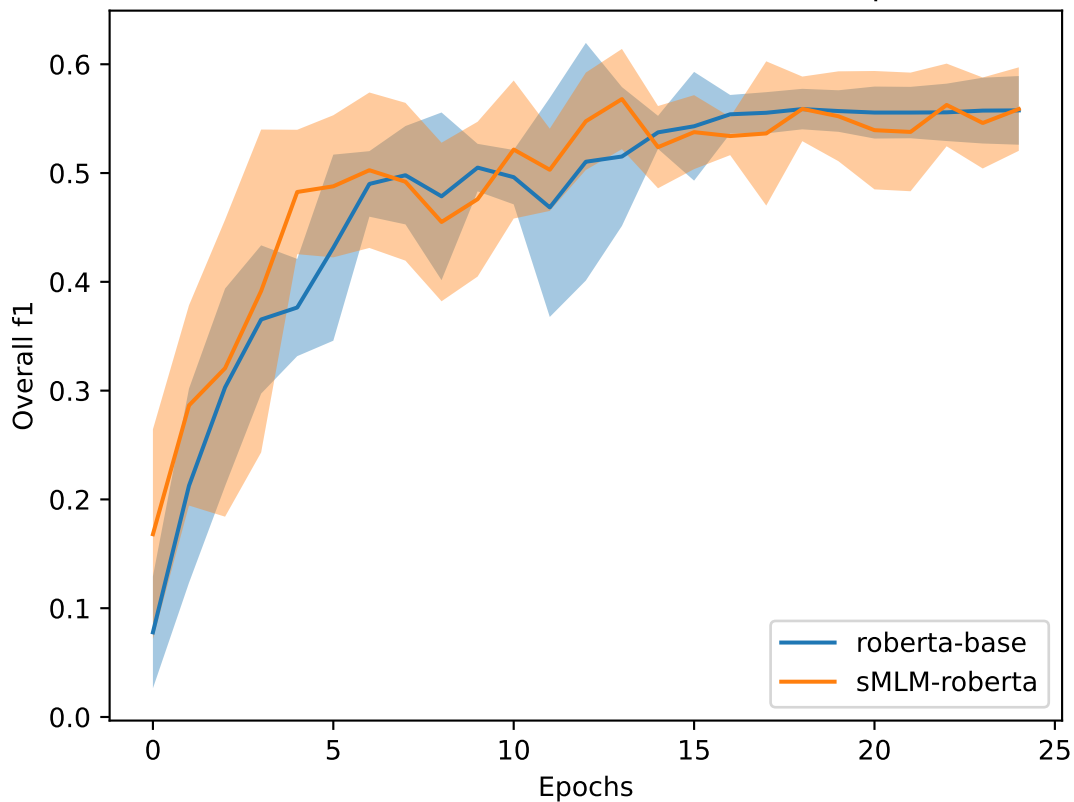

Supplement: software [file base_roberta_vs_smlm.pdf › final_submit_code/logs/plots/base_roberta_vs_smlm.pdf]

Micro f1 for ACI on CMV Modes 50-50 split

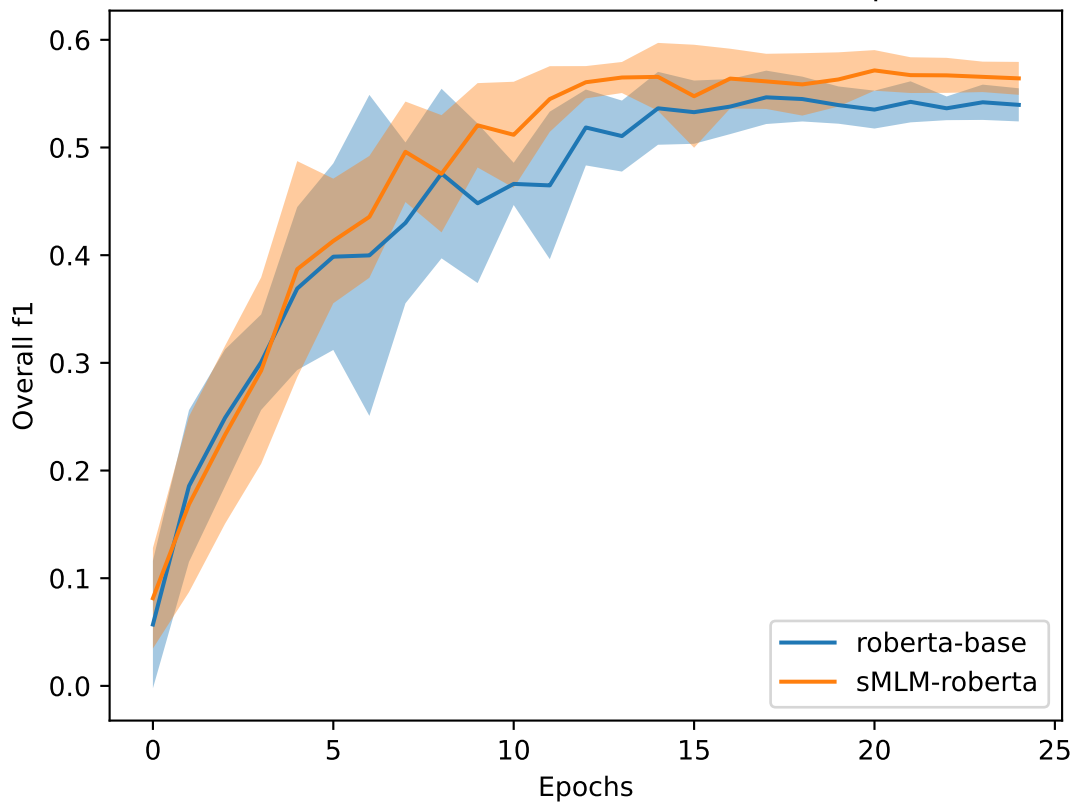

Supplement: software [file base_roberta_vs_smlm1.pdf › final_submit_code/logs/plots/base_roberta_vs_smlm1.pdf]

Weighted f1 for Relation Prediction on CMV Modes 80-20 split

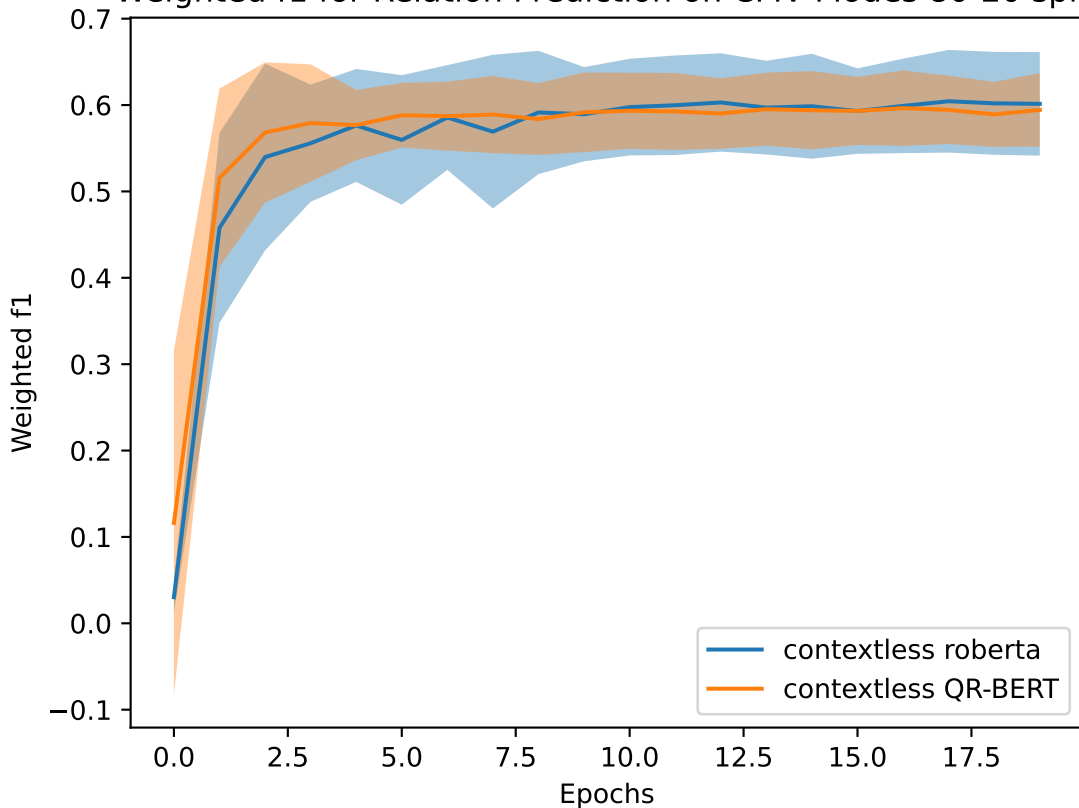

Supplement: software [file contextless_qr_bert.pdf › final_submit_code/logs/plots/contextless_qr_bert.pdf]

Weighted f1 for Relation Prediction on CMV Modes 50-50 split

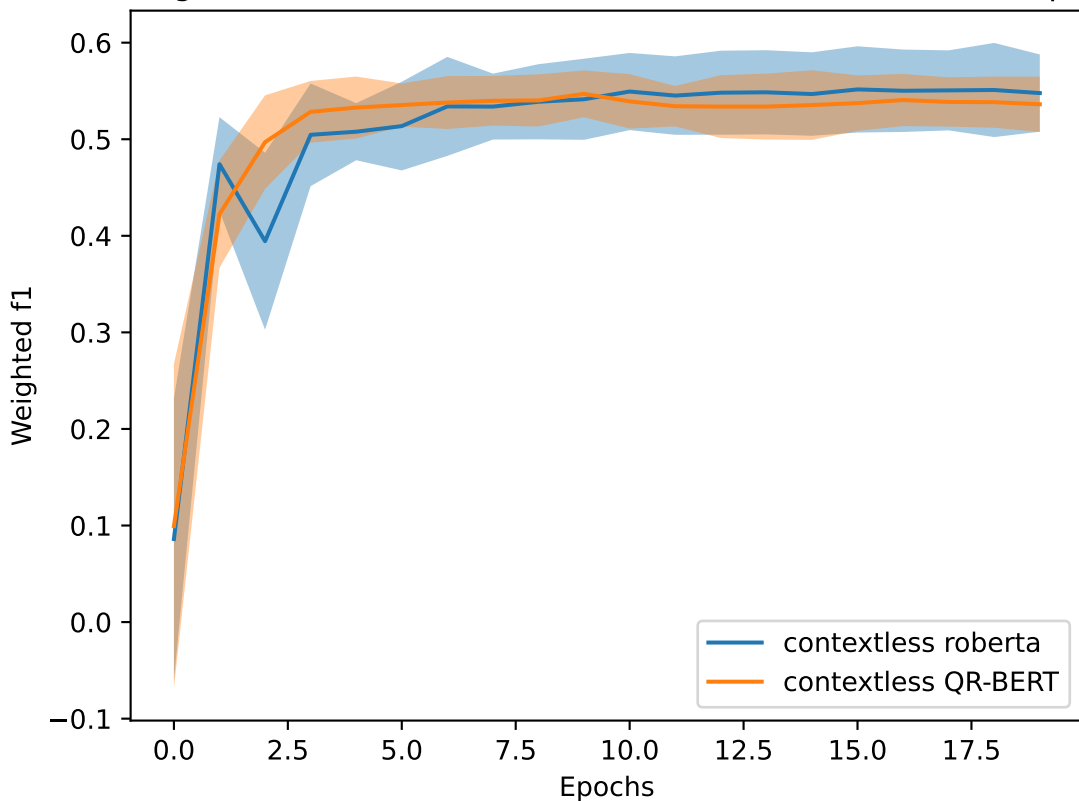

Supplement: software [file contextless_qr_bert1.pdf › final_submit_code/logs/plots/contextless_qr_bert1.pdf]

Weighted f1 for Relation Prediction on CMV Modes 80-20 split

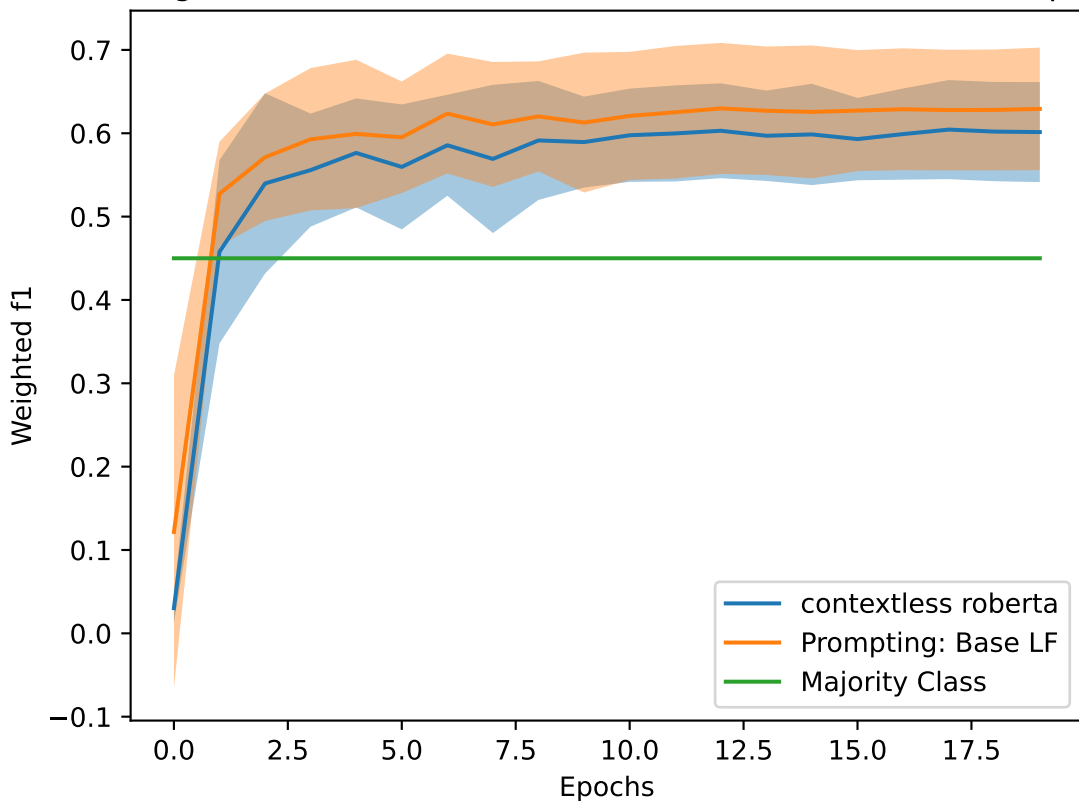

Supplement: software [file contextless_roberta.pdf › final_submit_code/logs/plots/contextless_roberta.pdf]

Weighted f1 for Relation Prediction on CMV Modes 50-50 split

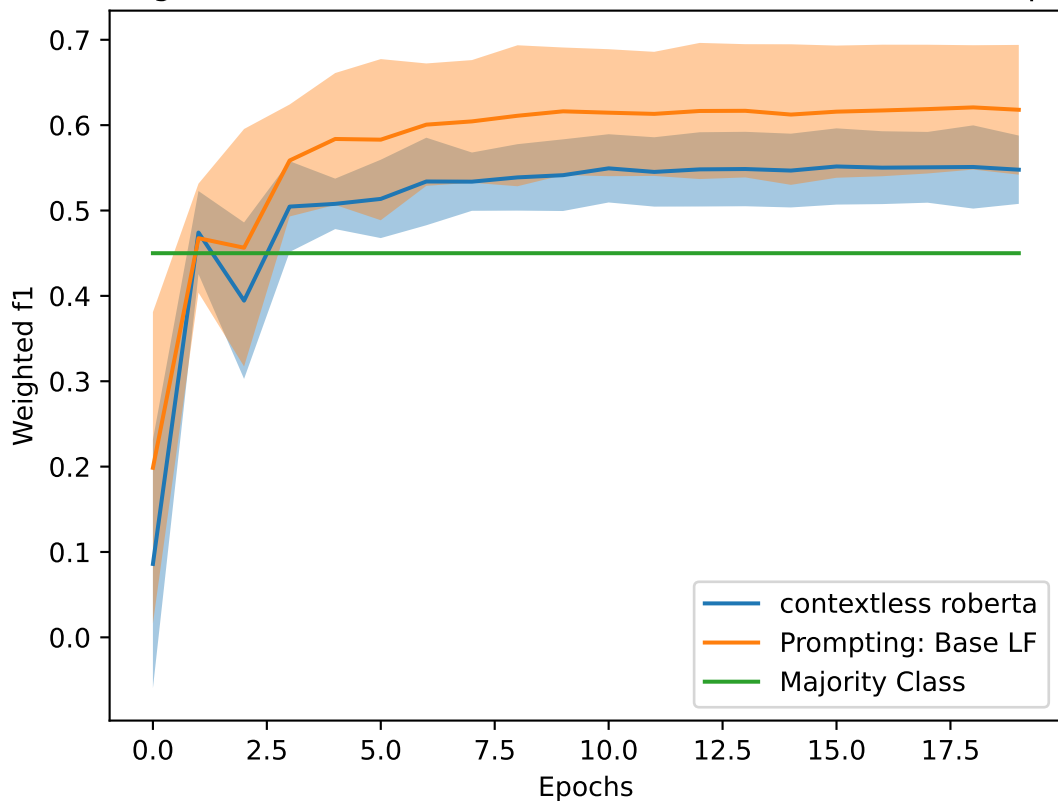

Supplement: software [file contextless_roberta1.pdf › final_submit_code/logs/plots/contextless_roberta1.pdf]

Micro f1 for Argument Component Prediction on CMV-Modes 80-20 split

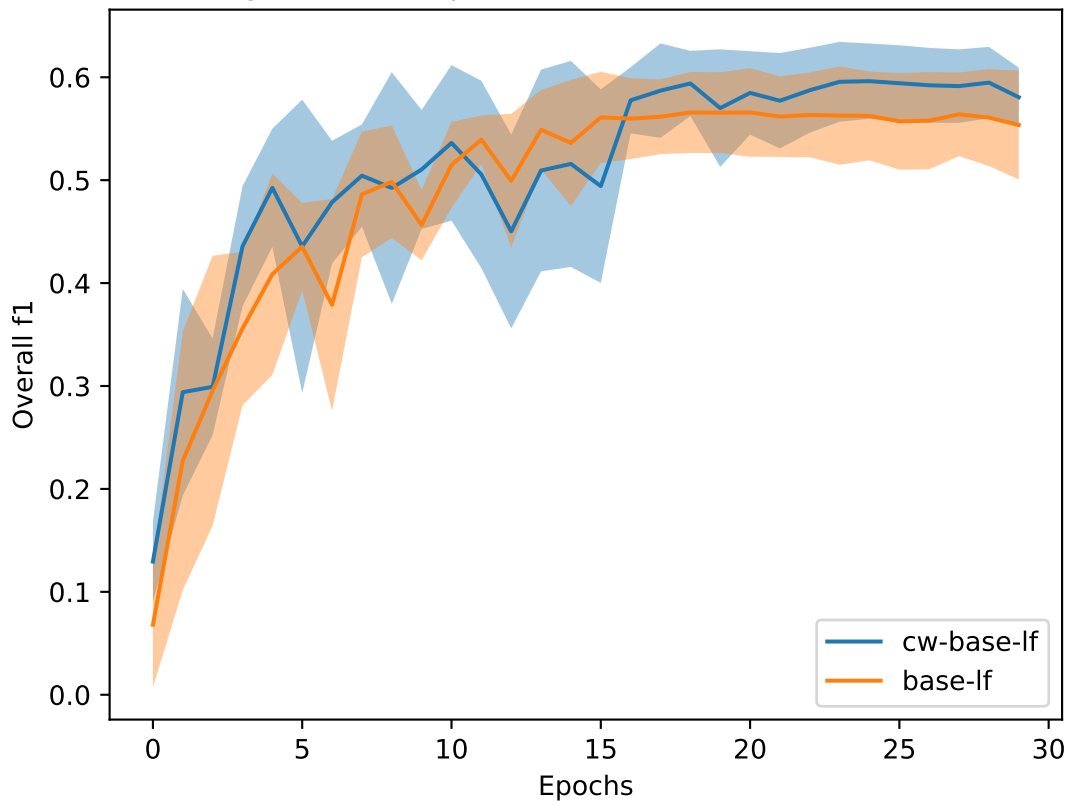

Supplement: software [file cw_lf.pdf › final_submit_code/logs/plots/cw_lf.pdf]

Micro f1 for Argument Component Prediction on CMV-Modes 50-50 split

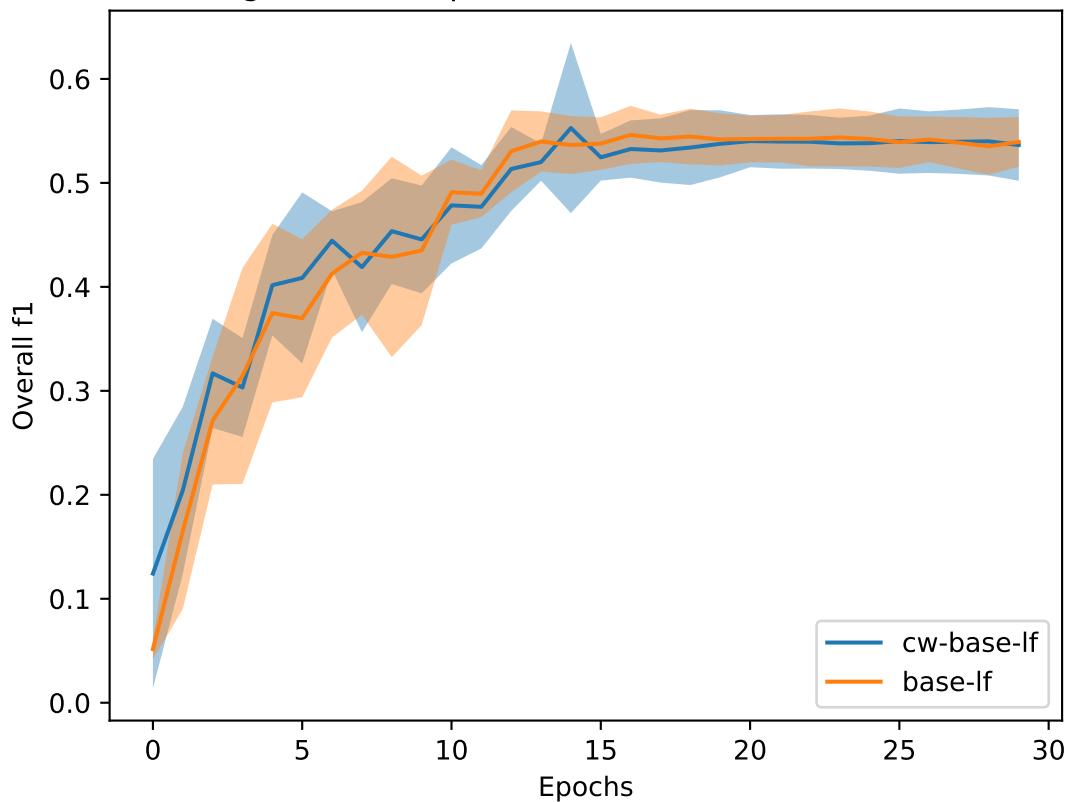

Supplement: software [file cw_lf1.pdf › final_submit_code/logs/plots/cw_lf1.pdf]

Weighted F1 for prompting Relation prediction over CMV Modes 80-20 split

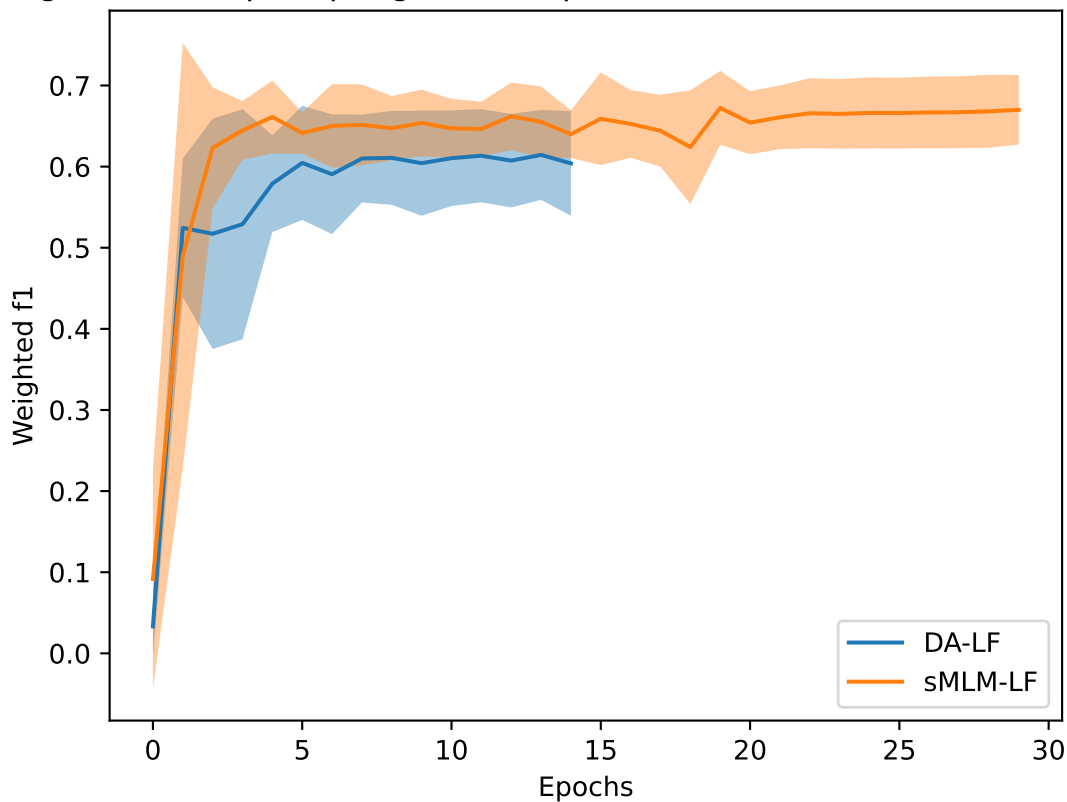

Supplement: software [file da_vs_sMLM_LF.pdf › final_submit_code/logs/plots/da_vs_sMLM_LF.pdf]

Weighted F1 for prompting Relation prediction over CMV Modes 50-50 split

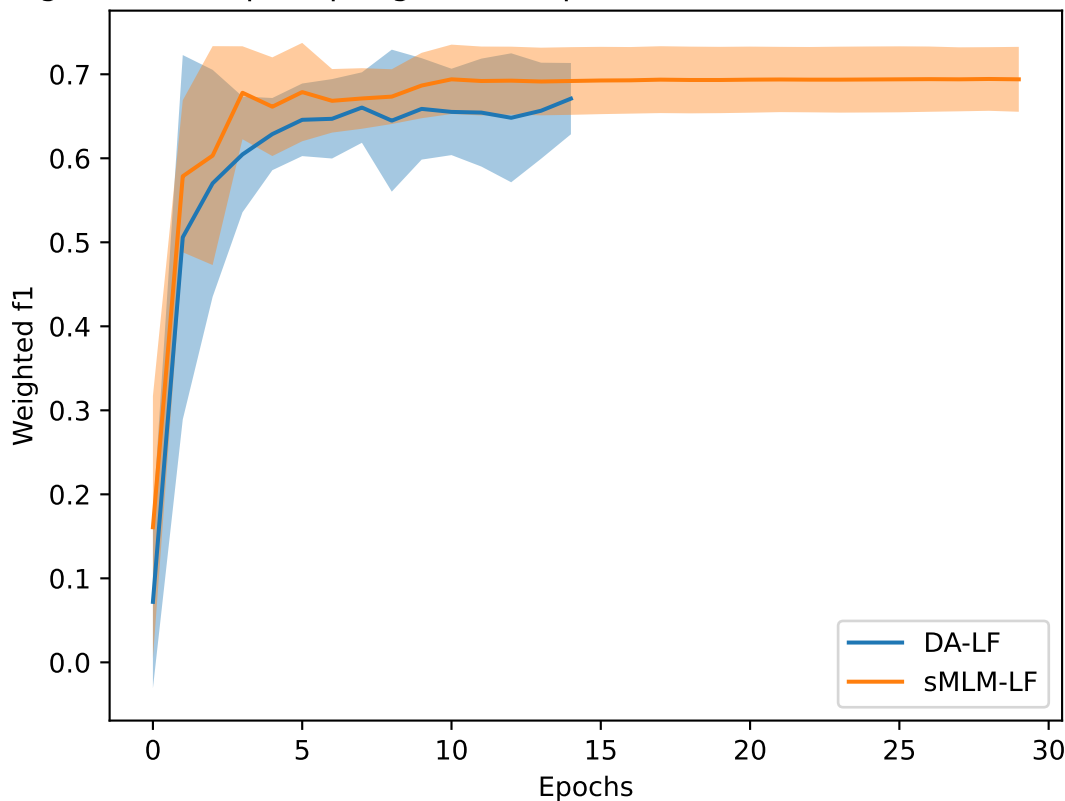

Supplement: software [file da_vs_sMLM_LF1.pdf › final_submit_code/logs/plots/da_vs_sMLM_LF1.pdf]

Micro f1 for Argument Component Prediction on CMV-Modes 80-20 split

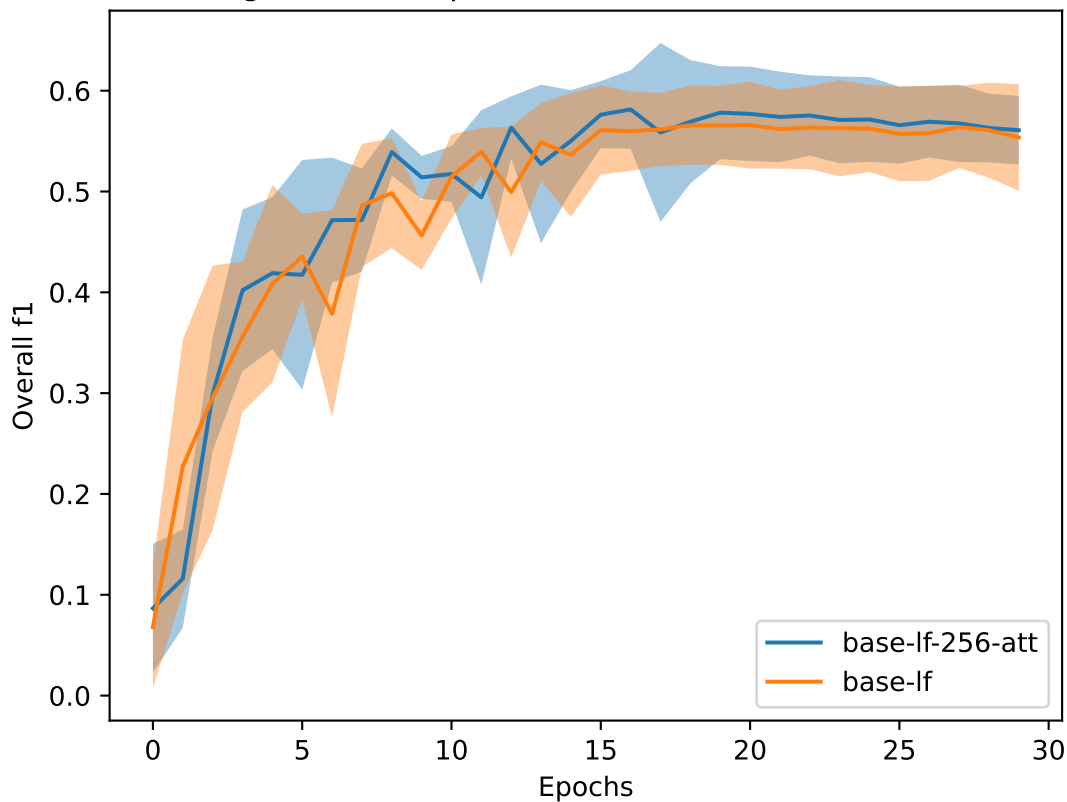

Supplement: software [file diff_att_window.pdf › final_submit_code/logs/plots/diff_att_window.pdf]

Micro f1 for Argument Component Prediction on CMV-Modes 50-50 split

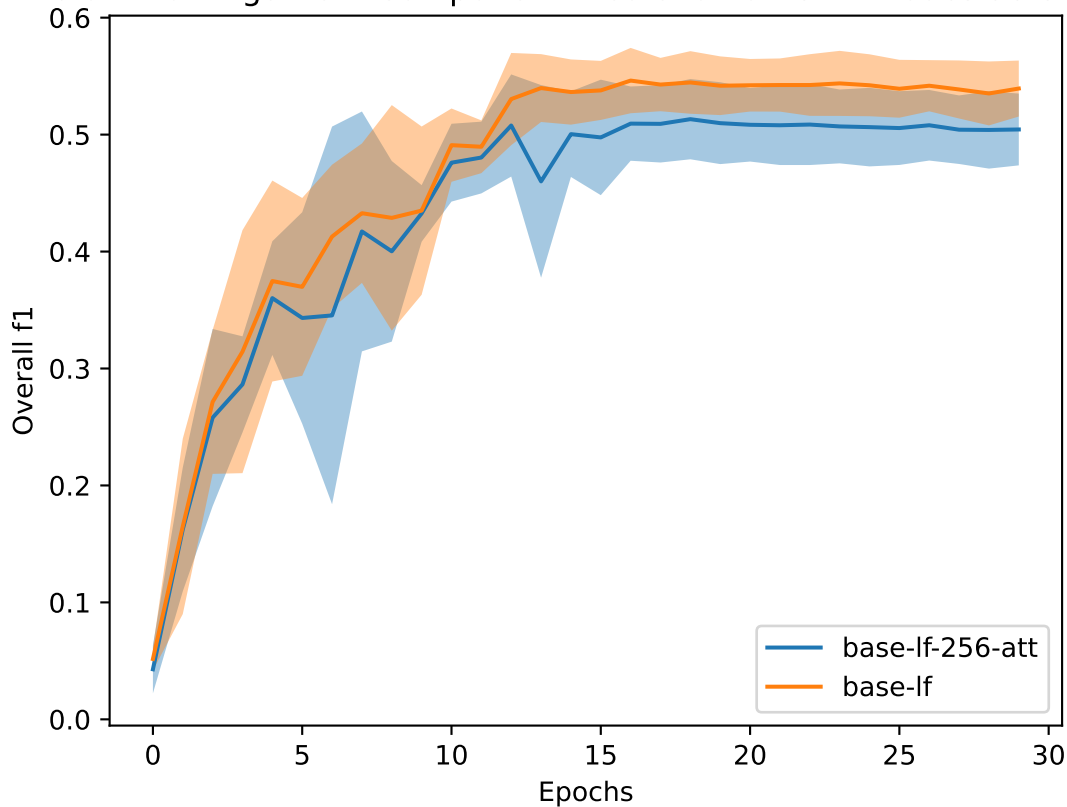

Supplement: software [file diff_att_window1.pdf › final_submit_code/logs/plots/diff_att_window1.pdf]

Weighted f1 for Prompting Relation Type Prediction on CMV Modes 50-50 spl

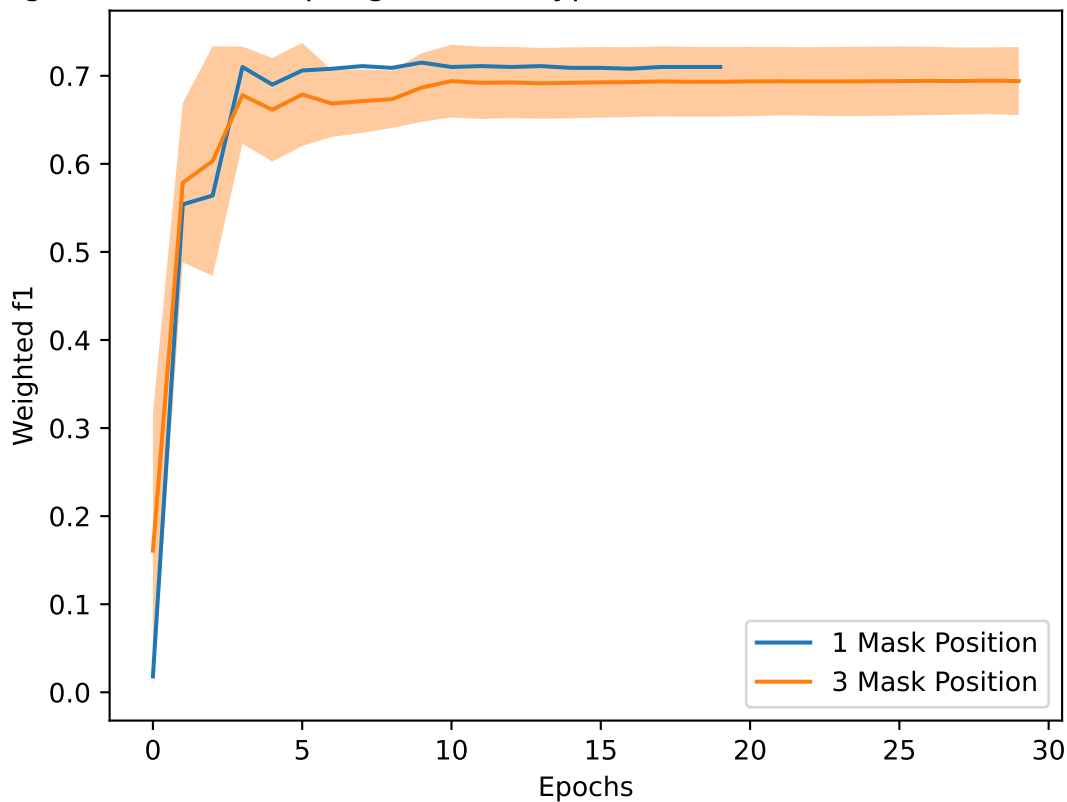

Supplement: software [file diff_mask_pos.pdf › final_submit_code/logs/plots/diff_mask_pos.pdf]

Weighted f1 for Prompting Relation Type Prediction on CMV Modes 50-50 spl

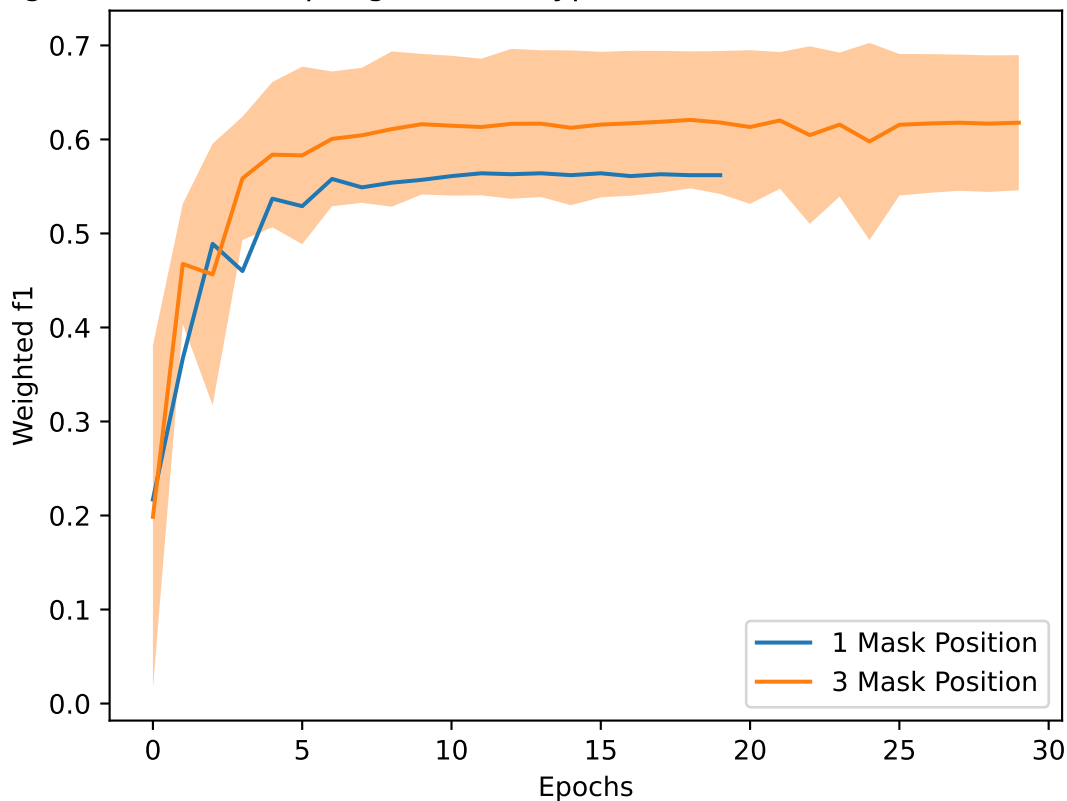

Supplement: software [file diff_mask_pos1.pdf › final_submit_code/logs/plots/diff_mask_pos1.pdf]

Micro f1 for Argument Component Prediction on Dr. Inventor 80-20 split

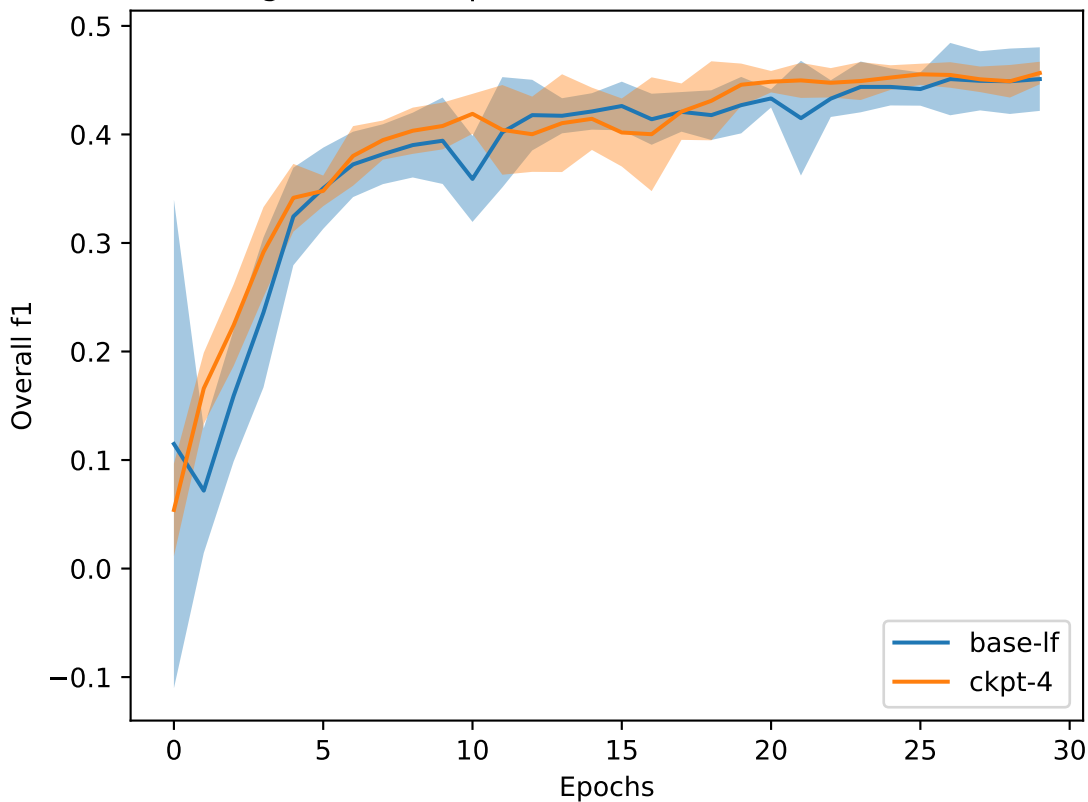

Supplement: software [file dr_inv_seg.pdf › final_submit_code/logs/plots/dr_inv_seg.pdf]

Micro f1 for Argument Component Prediction on Dr. Inventor 50-50 split

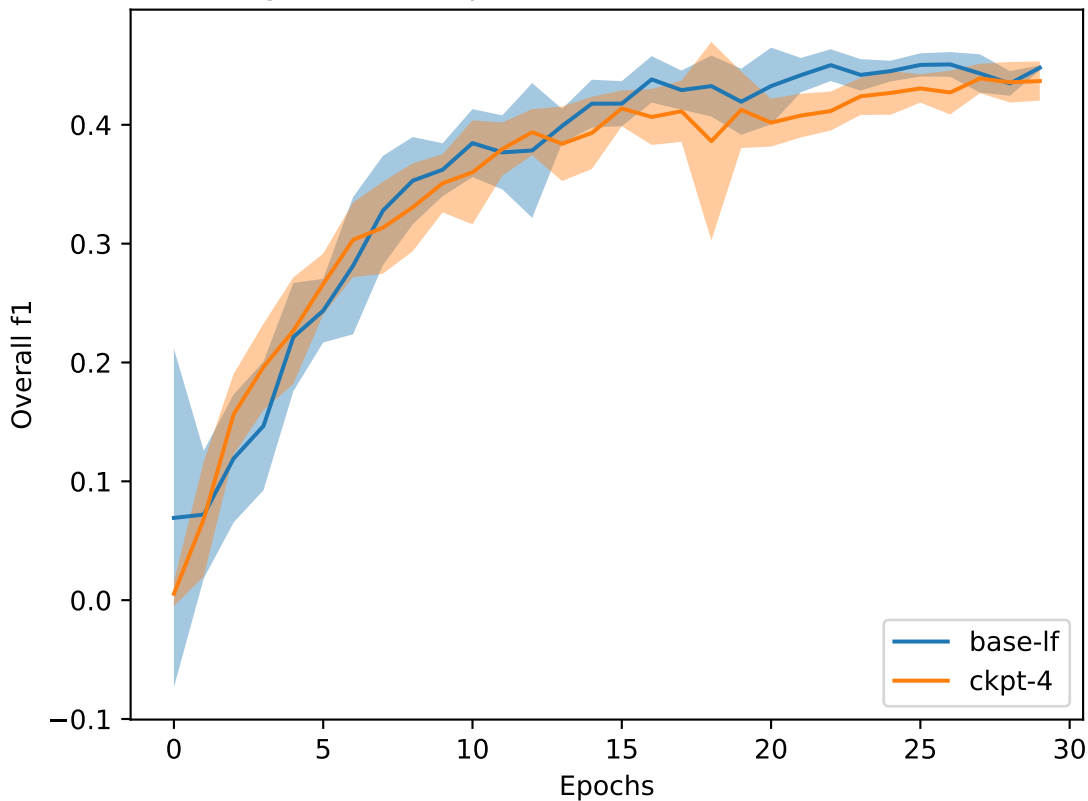

Supplement: software [file dr_inv_seg1.pdf › final_submit_code/logs/plots/dr_inv_seg1.pdf]

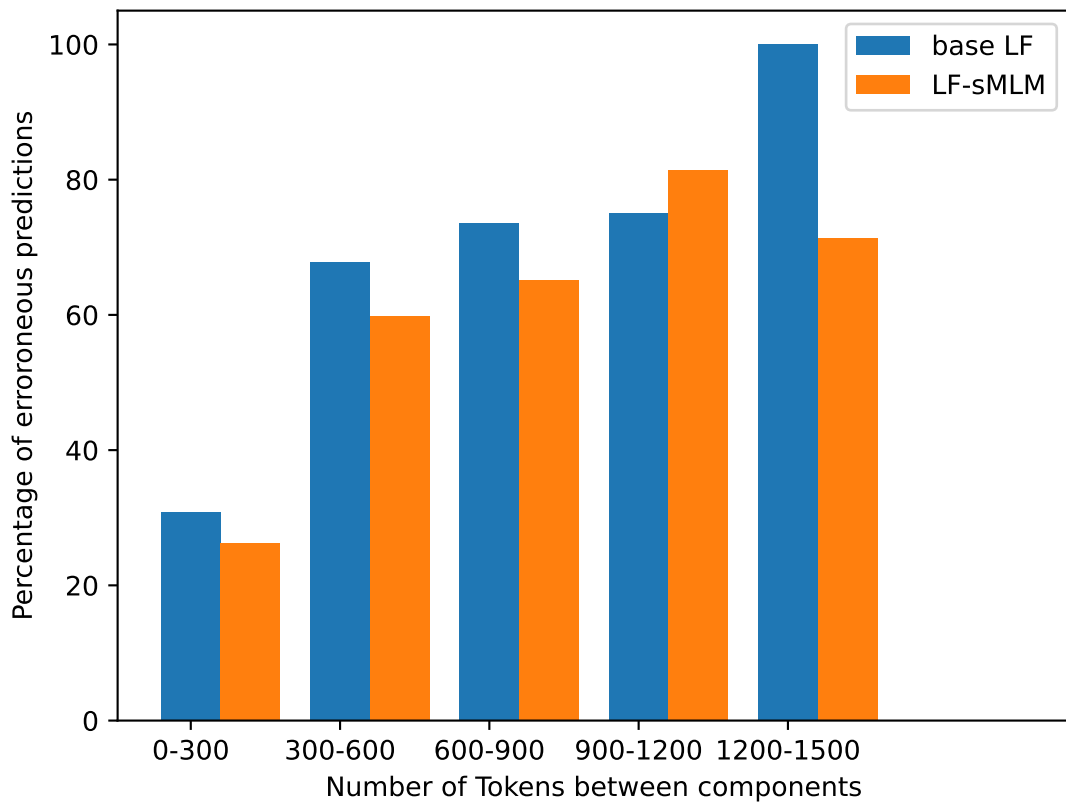

Supplement: software [file lf_error_with_dist.pdf › final_submit_code/logs/plots/lf_error_with_dist.pdf]

Overall f1 for Argument Component Prediction on CMV Modes 80-20 split

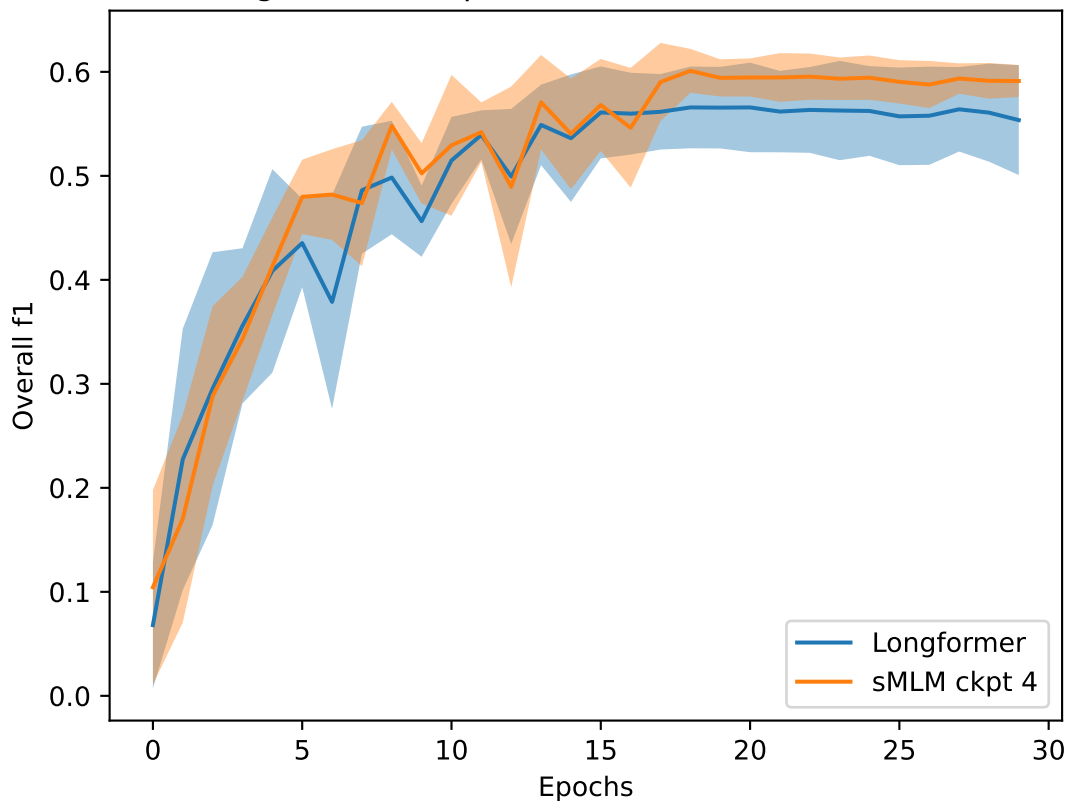

Supplement: software [file lf_smlm.pdf › final_submit_code/logs/plots/lf_smlm.pdf]

Overall f1 for Argument Component Prediction on CMV Modes 50-50 split

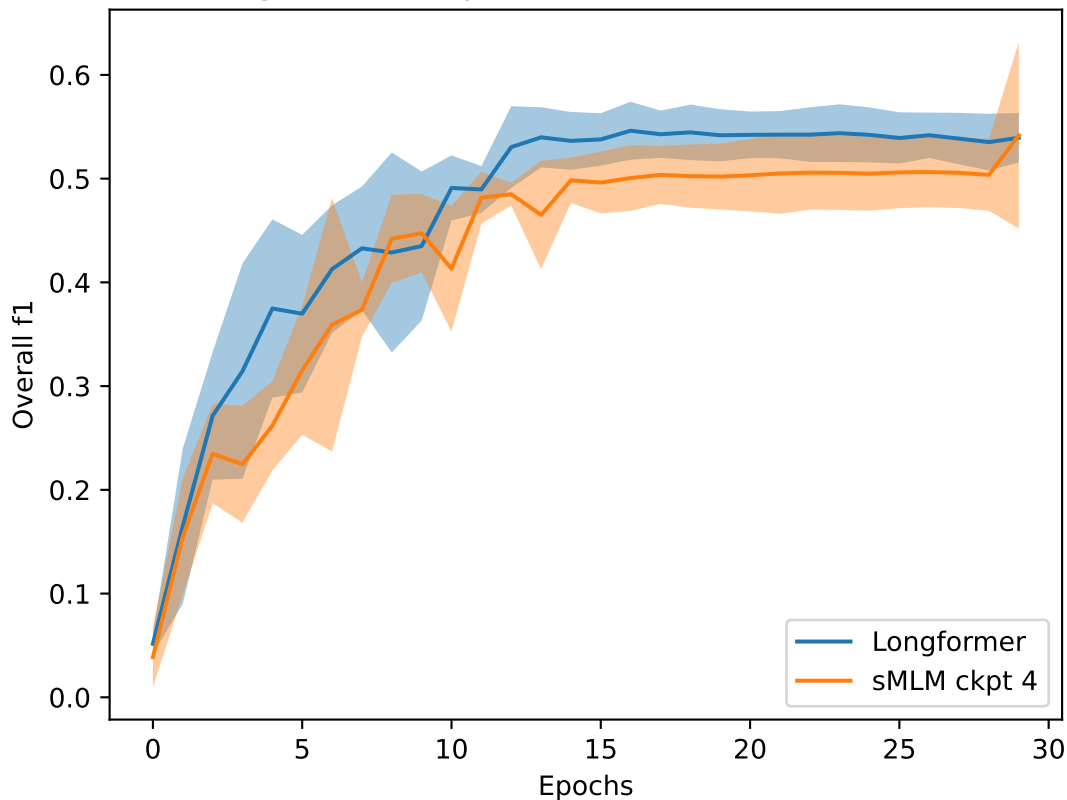

Supplement: software [file lf_smlm1.pdf › final_submit_code/logs/plots/lf_smlm1.pdf]

Mean Pooling relation prediction on CMV Modes 80-20 split

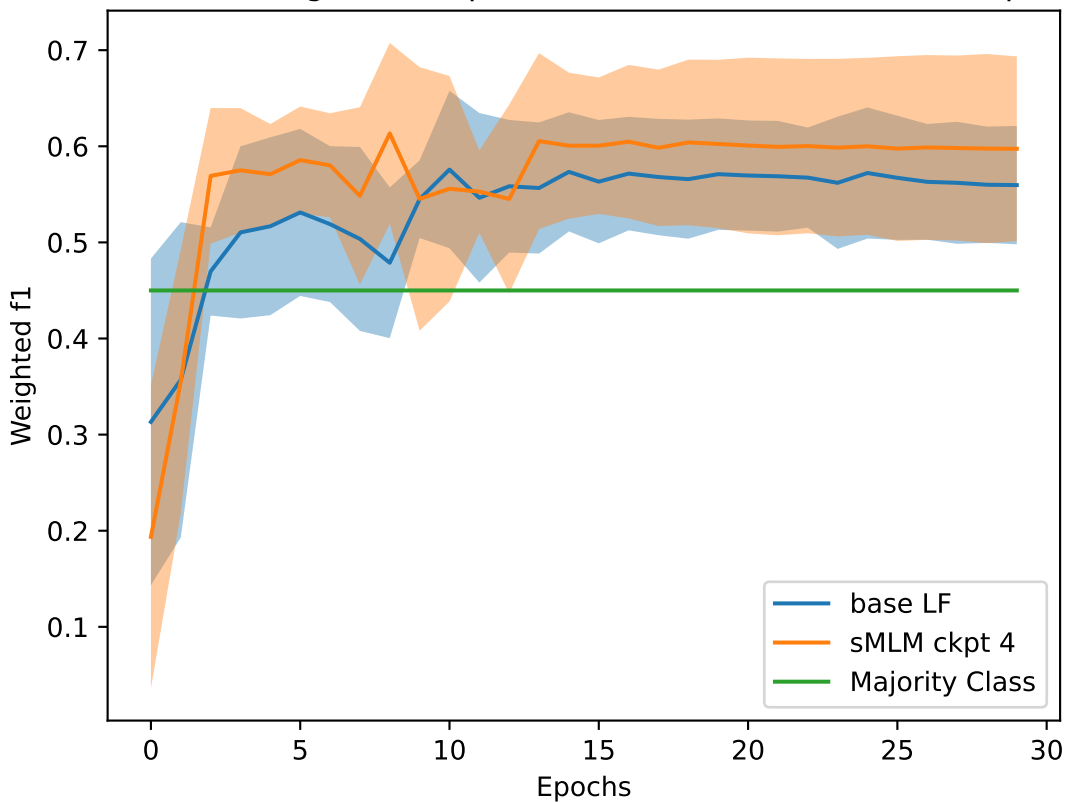

Supplement: software [file mean_pooling_rel_pred.pdf › final_submit_code/logs/plots/mean_pooling_rel_pred.pdf]

Mean Pooling relation prediction on CMV Modes 50-50 split

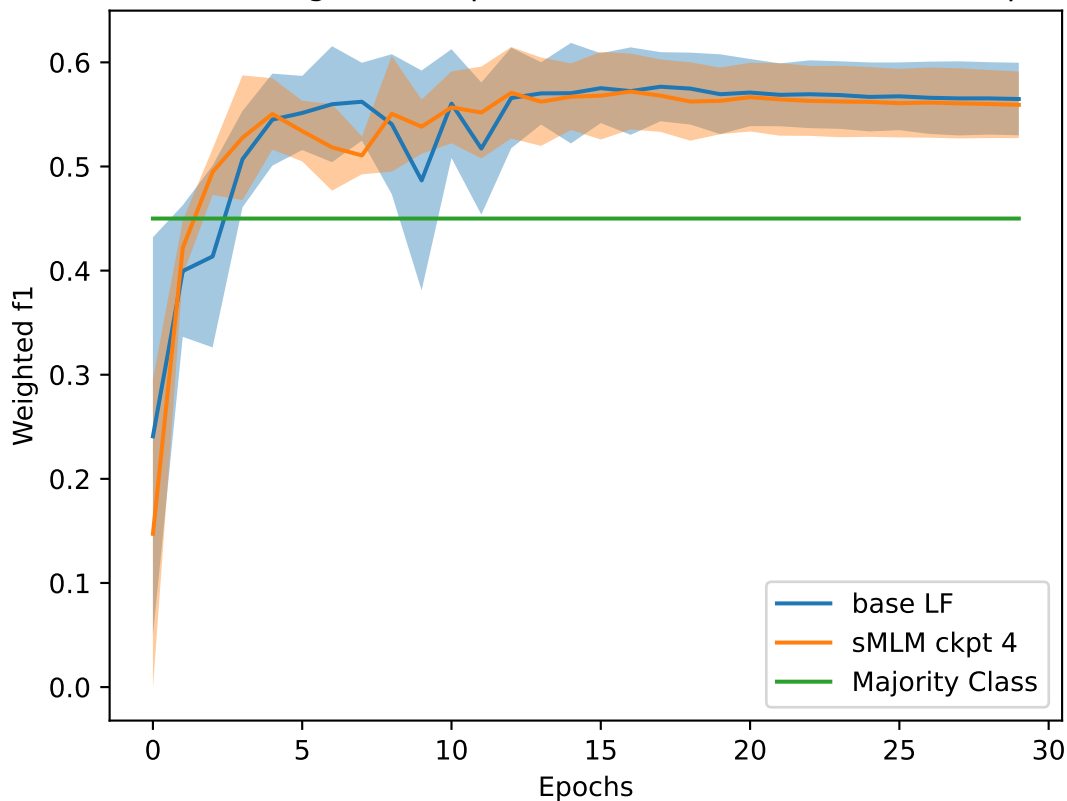

Supplement: software [file mean_pooling_rel_pred1.pdf › final_submit_code/logs/plots/mean_pooling_rel_pred1.pdf]

Weighted f1 for Relation Prediction on Dr. Inventor 80-20 split

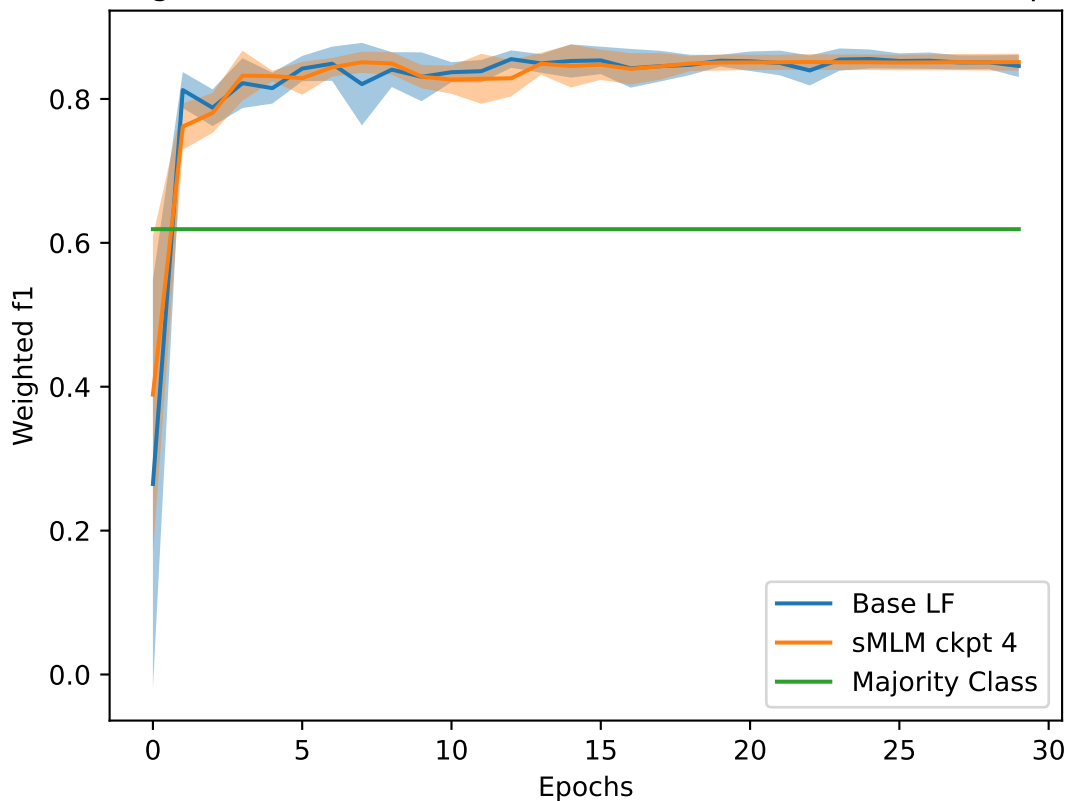

Supplement: software [file prompt_dr_inv.pdf › final_submit_code/logs/plots/prompt_dr_inv.pdf]

Weighted f1 for Relation Prediction on Dr. Inventor 50-50 split

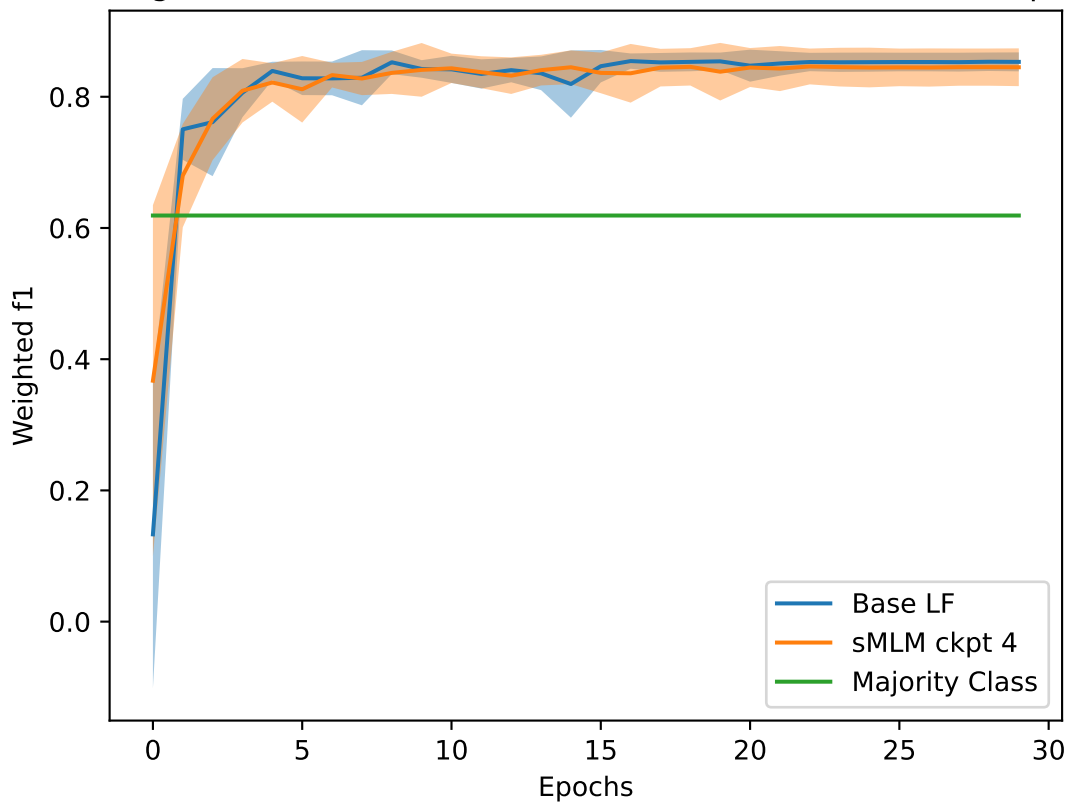

Supplement: software [file prompt_dr_inv1.pdf › final_submit_code/logs/plots/prompt_dr_inv1.pdf]

Prompting relation prediction on CMV Modes 80-20 split

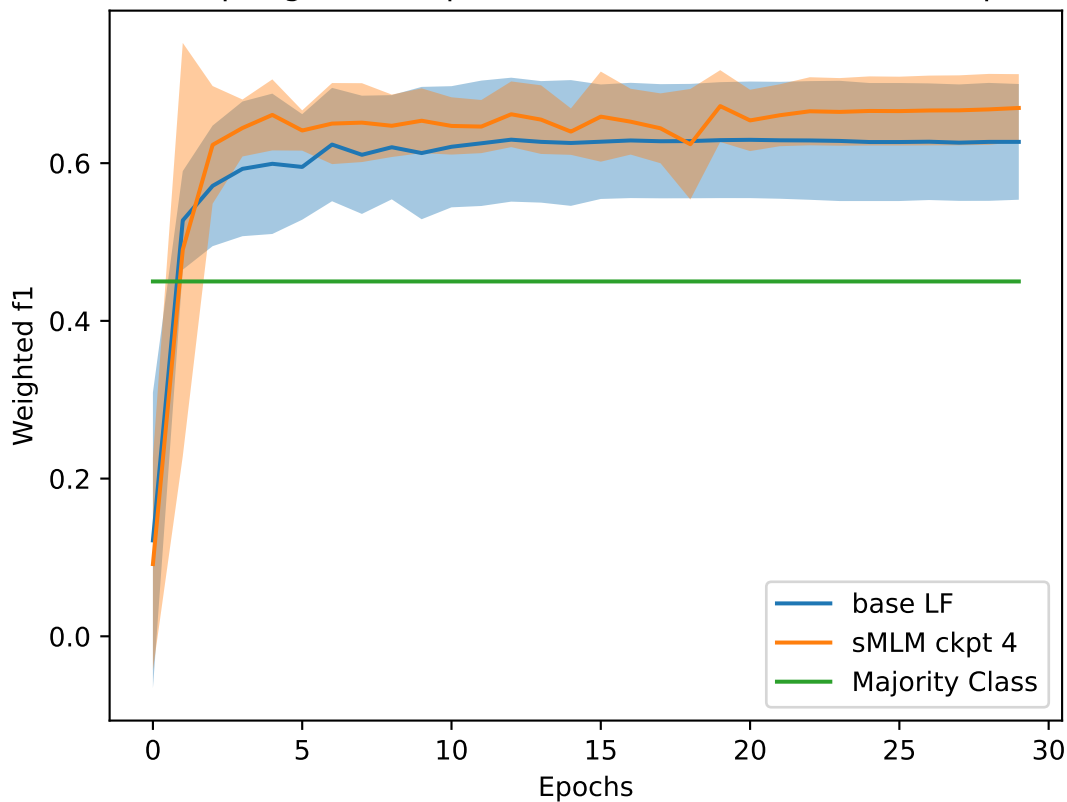

Supplement: software [file prompt_rel_pred.pdf › final_submit_code/logs/plots/prompt_rel_pred.pdf]

Prompting relation prediction on CMV Modes 50-50 split

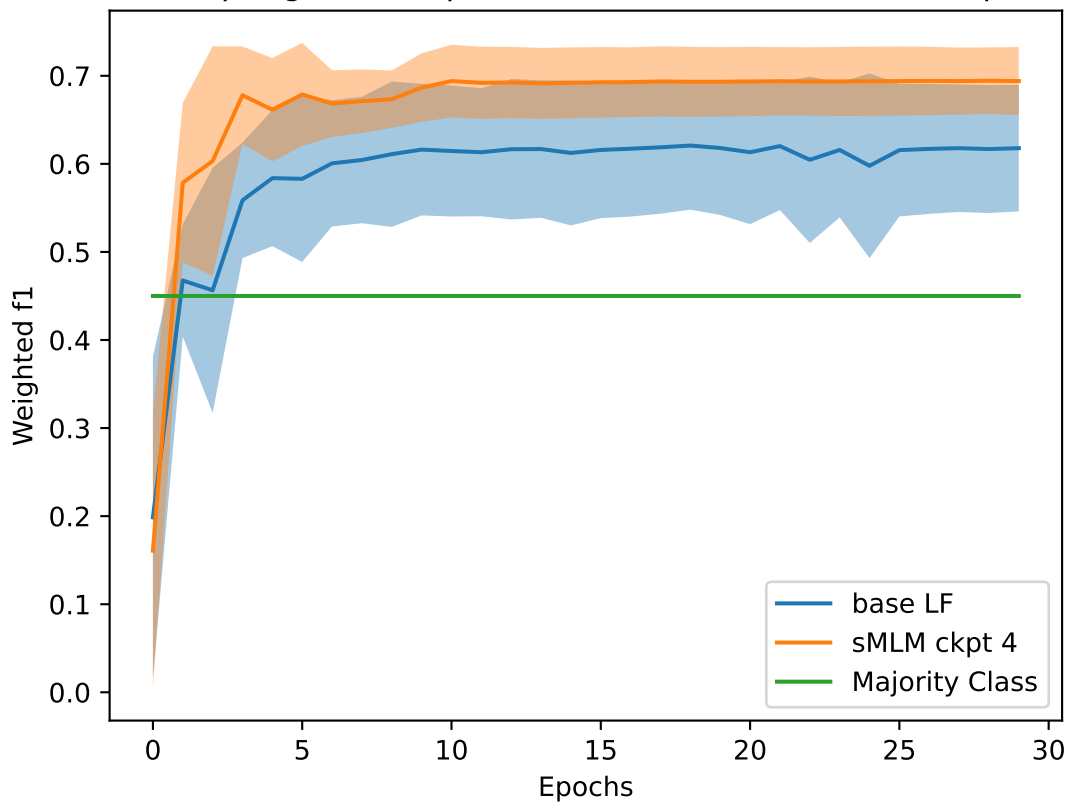

Supplement: software [file prompt_rel_pred1.pdf › final_submit_code/logs/plots/prompt_rel_pred1.pdf]

Micro f1 for ACI on CMV Modes 80-20 split

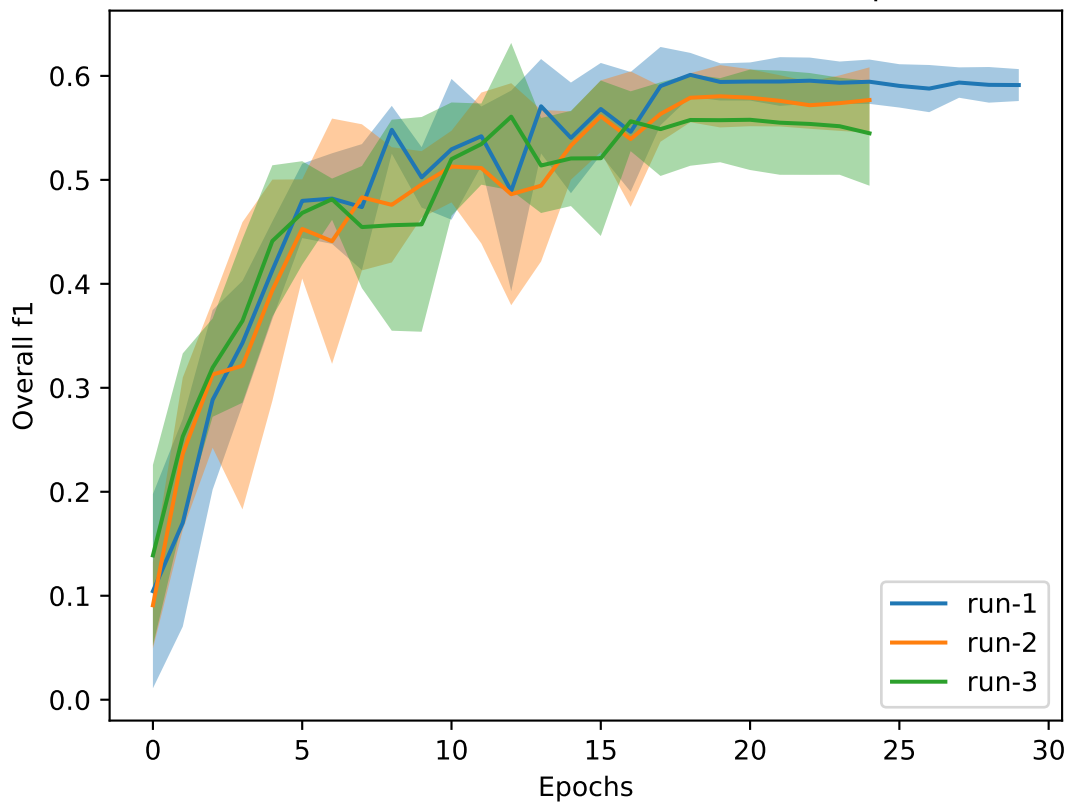

Supplement: software [file sMLM_LF_thread_lvl_repros.pdf › final_submit_code/logs/plots/sMLM_LF_thread_lvl_repros.pdf]

Micro f1 for ACI on CMV Modes 50-50 split

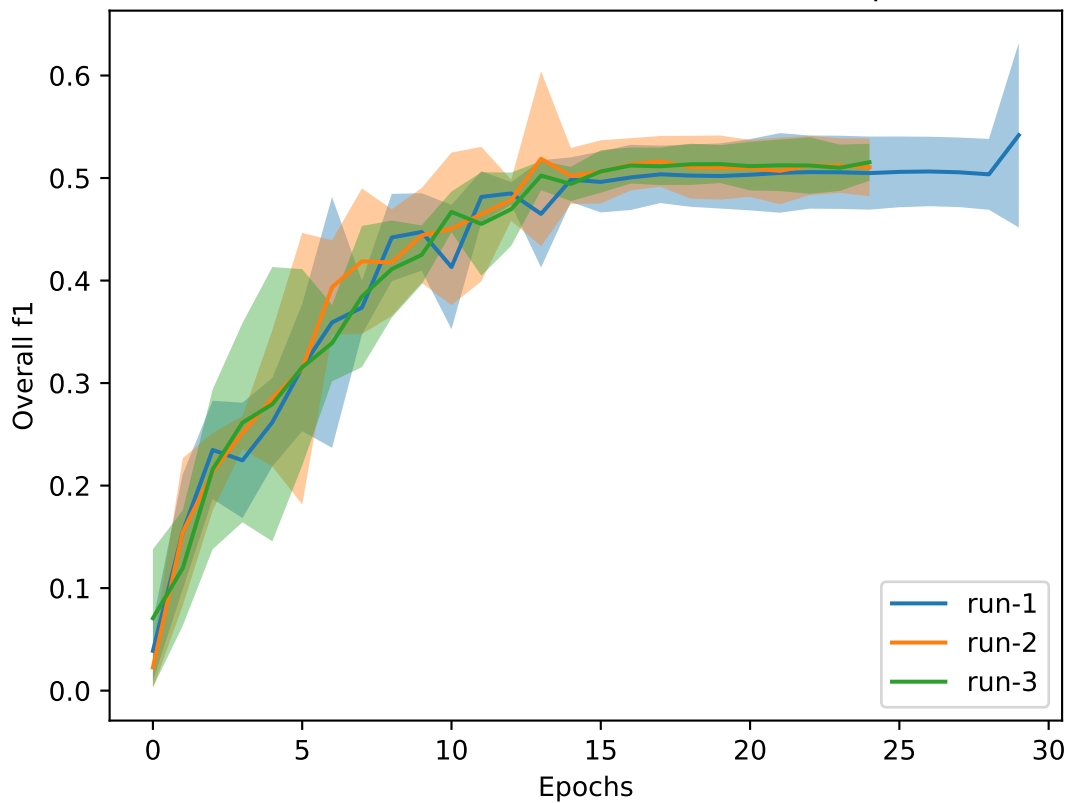

Supplement: software [file sMLM_LF_thread_lvl_repros1.pdf › final_submit_code/logs/plots/sMLM_LF_thread_lvl_repros1.pdf]

Overall f1 for Argument Component Prediction on CMV Modes 80-20 split

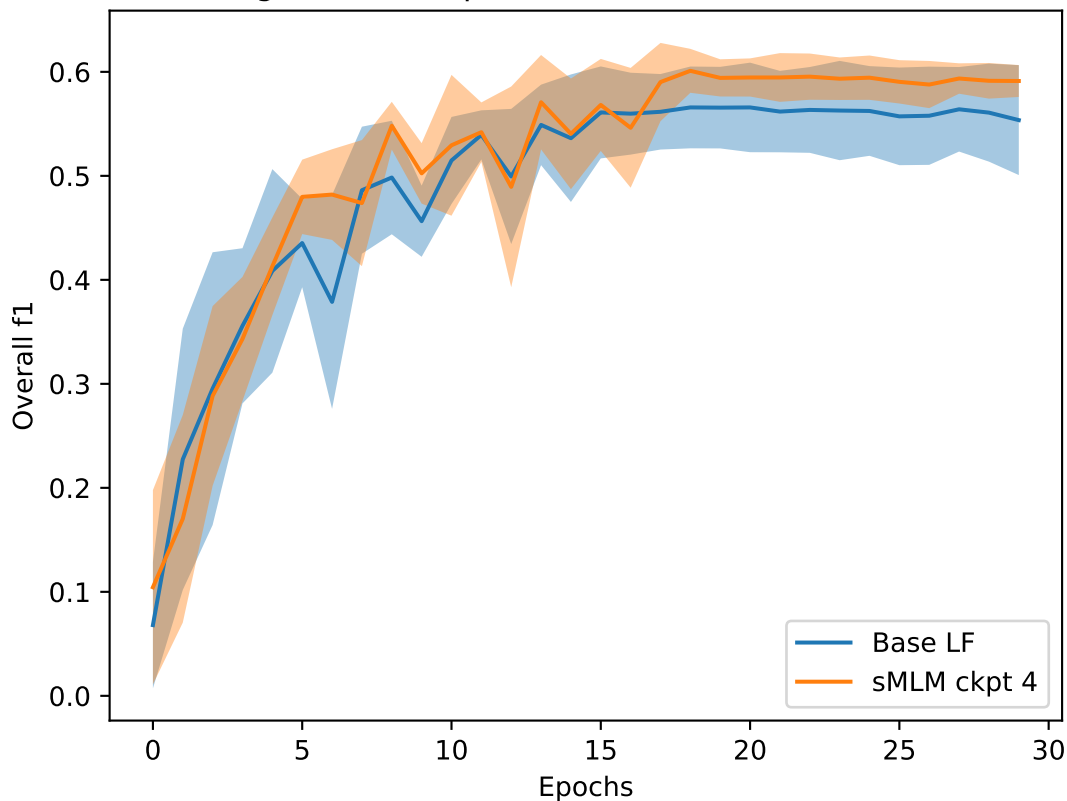

Supplement: software [file sample.pdf › final_submit_code/logs/plots/sample.pdf]
